# Supplementary material for: Methodology for earthquake rupture rate estimates of fault networks: example for the western Corinth rift, Greece
Source: Copernicus journal article supplement (doi:10.5194/nhess-17-1857-2017), 2017-10-27
Supplement: Supplementary file 1 [file nhess-17-1857-2017-supplement.pdf]

Supplement of Nat. Hazards Earth Syst. Sci., 17, 1857–1869, 2017  
<https://doi.org/10.5194/nhess-17-1857-2017-supplement>  
© Author(s) 2017. This work is distributed under  
the Creative Commons Attribution 3.0 License.

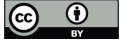

*Supplement of*

## **Methodology for earthquake rupture rate estimates of fault networks: example for the western Corinth rift, Greece**

**Thomas Chartier et al.**

*Correspondence to:* Thomas Chartier ([chartier@geologie.ens.fr](mailto:chartier@geologie.ens.fr))

The copyright of individual parts of the supplement might differ from the CC BY 3.0 License.

**Input information :**

|             |         |                 |
|-------------|---------|-----------------|
| $F_1$       | 2 mm/yr | $M_{max} = 6.2$ |
| $F_2$       | 3 mm/yr | $M_{max} = 6.3$ |
| $F_1 + F_2$ |         | $M_{max} = 6.6$ |

- ◇ 2 faults
- ◇ one possible F1 rupture scenario
- ◇ Size of the s-x increment = 0.001 mm/yr

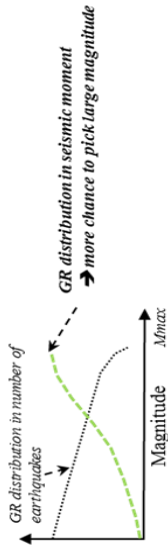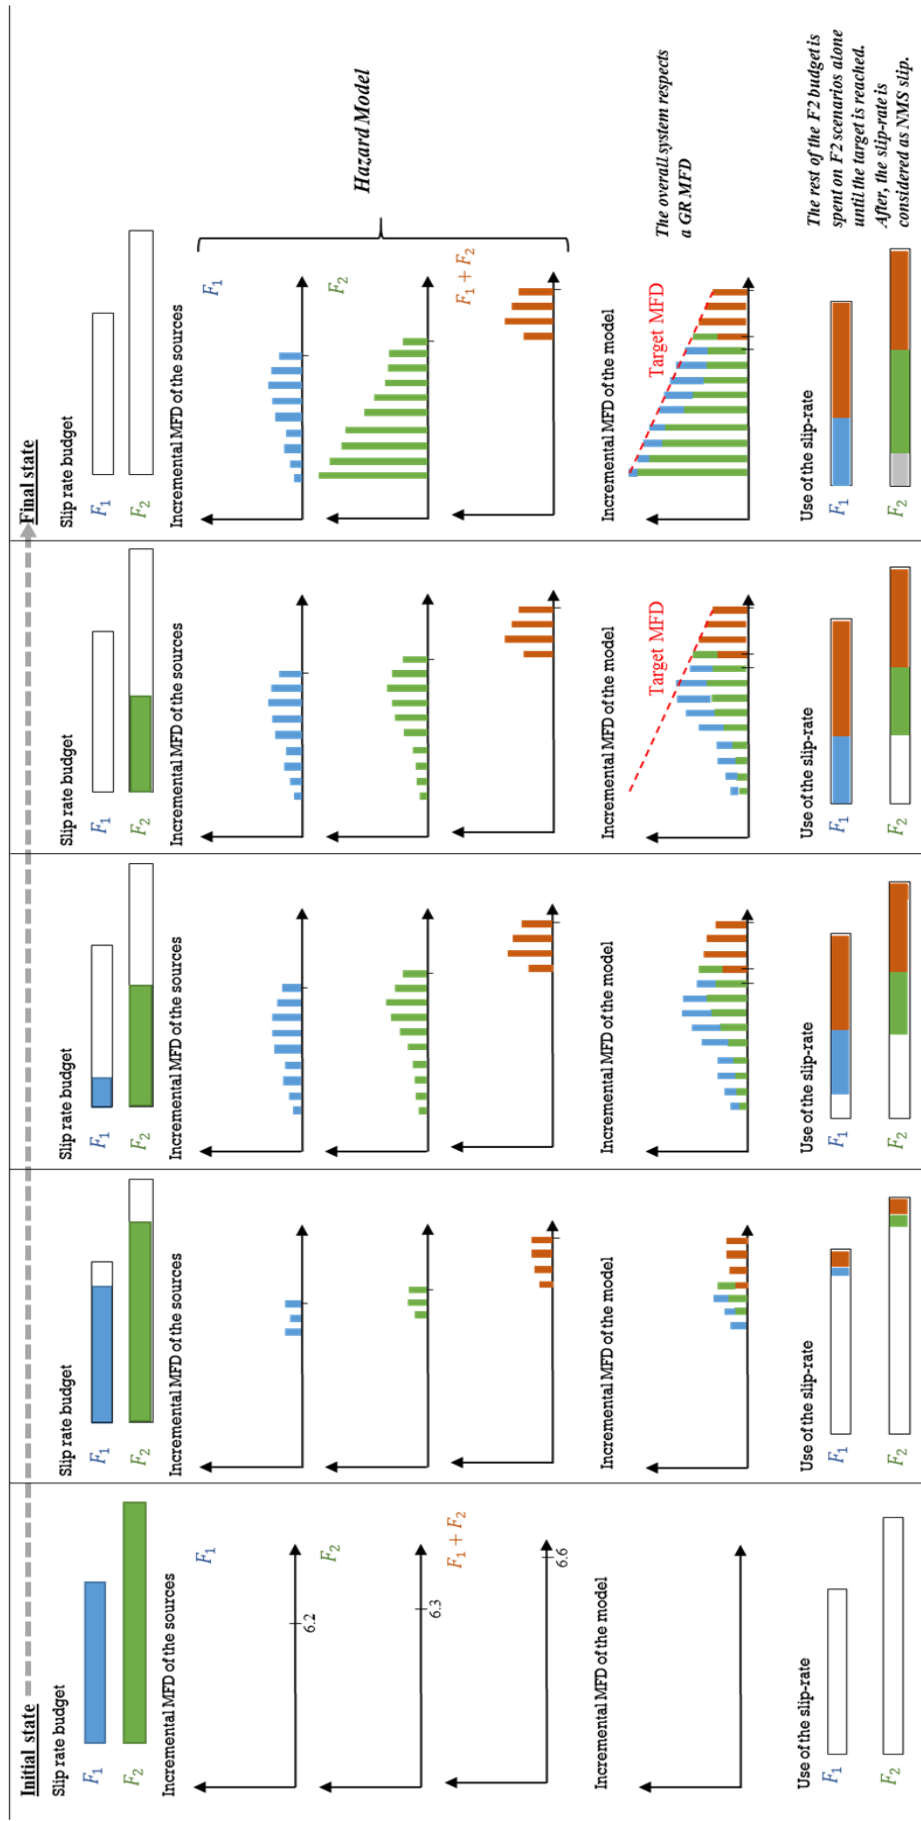

**Initial state of the methodology:**

- Fault slip-rate budgets are calculated
- Possible sources are defined (F1, F2 and F1+F2)

**After a few iteration steps:**

- Slip-rate budgets are spent, mostly on greater earthquakes on F1+F2 but also on F1 alone and F2 alone

**Iteration goes on:**

- More slip-rate budget is spent on greater earthquakes but lower magnitude earthquake on F1 an F2 start to be populated as well

**F1 slip-rate budget reaches 0:**

- No more EQ can be generated on F1+F2 since it requires to spend F1 budget. The target MFD can be drawn using the rate of the greater magnitude EQ and the b value imposed.

**Toward final state:**

- The rest of F2 budget is spent on F2 scenarios alone until the target is reached. After, the slip-rate is considered as NMS slip.

The overall system respects a GR MFD

The rest of the F2 budget is spent on F2 scenarios alone until the target is reached. After, the slip-rate is considered as NMS slip.
